# Supplementary material for: Host interactors of effector proteins of the lettuce downy mildew Bremia lactucae obtained by yeast two-hybrid screening
Source: PubMed Central journal article supplement (PMC7217486; doi:10.1371/journal.pone.0226540), 2020-05-12
Supplement: pone.0226540.s011.pdf [file pone.0226540.s011.pdf]

# Chemiluminescence\_blot\_effector proteins1

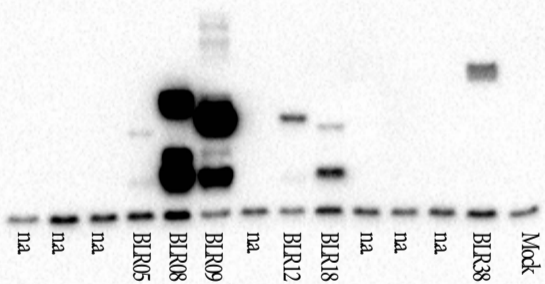

Marker\_blot\_effector proteins1

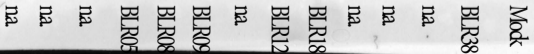

A Western blot image showing marker effector proteins. The lanes are labeled from top to bottom: Mock, BLR38, na, na, na, na, BLR18, BLR12, na, BLR09, BLR08, BLR05, na, na, na. The Mock lane shows a series of distinct bands. The other lanes show varying patterns of bands, with some lanes (na) showing no bands. A large, irregular white stain is present in the center of the blot, partially obscuring the lanes.

| Lane Label | Band Pattern            |
|------------|-------------------------|
| Mock       | Multiple distinct bands |
| BLR38      | Multiple distinct bands |
| na         | No bands                |
| na         | No bands                |
| na         | No bands                |
| na         | No bands                |
| BLR18      | Multiple distinct bands |
| BLR12      | Multiple distinct bands |
| na         | No bands                |
| BLR09      | Multiple distinct bands |
| BLR08      | Multiple distinct bands |
| BLR05      | Multiple distinct bands |
| na         | No bands                |
| na         | No bands                |
| na         | No bands                |

# Chemiluminescence\_blot\_target proteins1

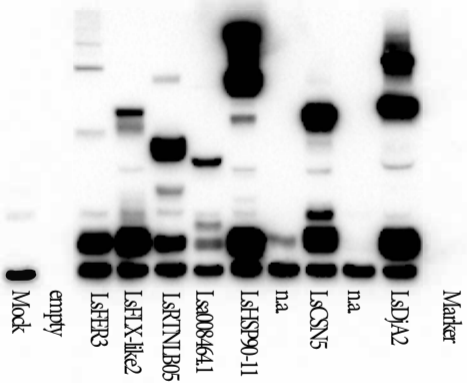

Marker\_blot\_target proteins1

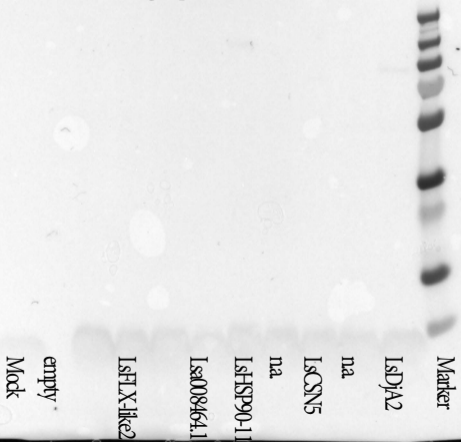

# Chemiluminescence\_blot\_target\_proteins2 and BLG02

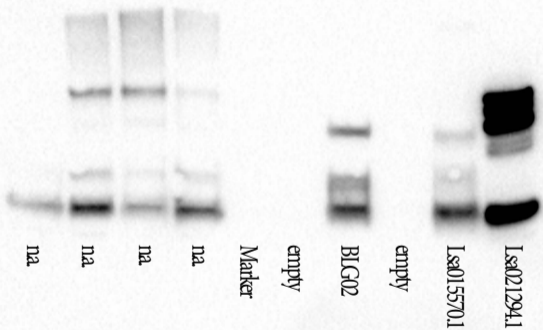

Marker\_blot\_target\_proteins2 and BLG02

Isa02129  
Isa015  
empty  
BLG0  
empty  
Marker  
na  
na  
na  
na

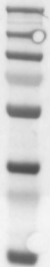

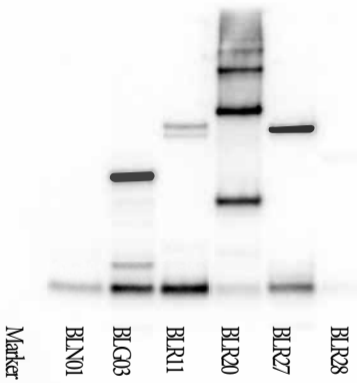

Chemiluminescence\_blot\_effector proteins2\_detection 1 sec

Western blot analysis showing chemiluminescence detection of effector proteins. The blot displays several lanes, each labeled with a BLR strain or a marker. The lanes are: BLR28, BLR27, BLR20, BLR11, BLG03, BLN01, and Marker. The BLR28, BLR27, and BLR20 lanes show a prominent, dark band at the top, indicating a strong signal. The BLR11, BLG03, and BLN01 lanes show a similar band at the top, but it is less intense. The Marker lane shows a distinct band at the bottom, serving as a reference point.

BLR28  
BLR27  
BLR20  
BLR11  
BLG03  
BLN01  
Marker

Chemiluminescence\_blot\_effector proteins2\_detection 37 sec



Marker\_blot\_effector proteins2

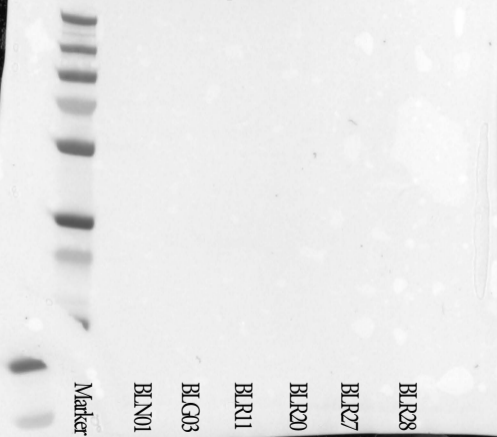

Marker

BLN01

BLG03

BLR11

BLR20

BLR27

BLR28

Marker

# Chemiluminescence\_blot\_target\_proteins3

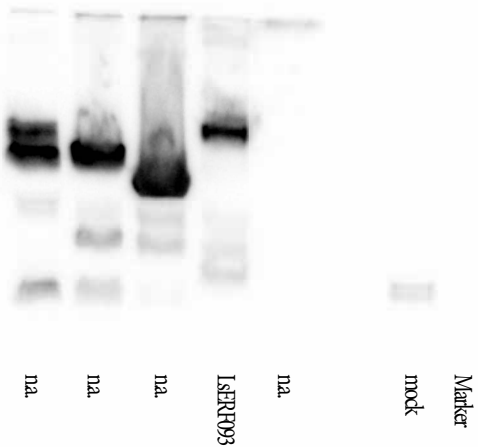

Chemiluminescence\_Marker\_merge\_target\_proteins3

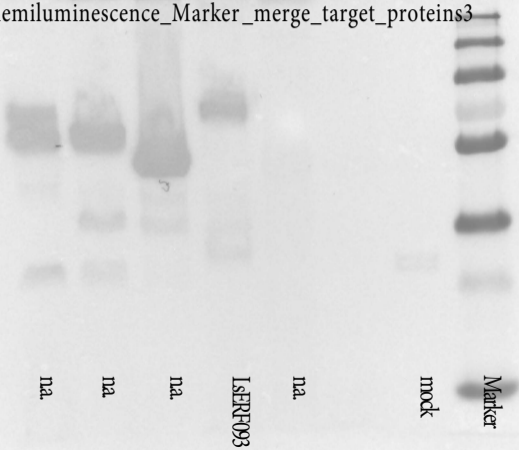

Marker

modk

n.a.

ISERF093

n.a.

n.a.

n.a.
